# Supplementary material for: A new method for the quantification of ambient particulate matter emissions
Source: Copernicus journal article supplement (doi:10.5194/acp-2022-843), 2023-01-09
Supplement: Supplementary file [file acp-2022-843-AC1-supplement.pdf]

Anonymous Referee #1

The idea of the paper of obtaining fluxes of emission for dust and sulphate is very interesting. However, the presentation is poor and the support to results and conclusions is weak in my opinion.

I am in the interphase of major revision or rejection.

*The authors are grateful for all the reviewer's comments and suggestions.*

*The corresponding author would like to state the following:*

*There was an error in the units of the emission fluxes from each grid cell.*

*We will correct this in the manuscript and the deducted emission maps.*

*Our answers on your questions follow in italics:*

1. Change in tittle and all text 'emission factors' by 'emission fluxes'. 'Emission factor' in 'emission and projections' has a very well-defined meaning, with kg or t/unit of activity. When referring to emission or deposition per area and time, the term 'fluxes' is used.

*We will replace in the title and all text 'emission factors' by 'emission fluxes'. The title will now be: 'A new method for the quantification of ambient particulate matter emission fluxes'*

2. References for health studies are ok but old, please update at least with the most recent papers on the Global Burden of disease and 2021 WHO AQ guidelines

*We will add the following articles:*

*Ghosh et al., 2021, Ambient and household PM<sub>2.5</sub> pollution and adverse perinatal outcomes: A meta-regression and analysis of attributable global burden for 204 countries and territories, PLOS Medicine, 18, e1003718;*

*Burkart et al., Estimates, trends, and drivers of the global burden of type 2 diabetes attributable to PM<sub>2.5</sub> air pollution, 1990–2019: an analysis of data from the Global Burden of Disease Study 2019, The Lancet Planetary Health, 6, 2022;*

*Pandey et al., 2021; Health and economic impact of air pollution in the states of India: the Global Burden of Disease Study 2019, The Lancet Planetary Health, 5, e25–e38*

*WHO, 2021. WHO global air quality guidelines. Particulate matter (PM<sub>2.5</sub> and PM<sub>10</sub>), ozone, nitrogen dioxide, sulfur dioxide and carbon monoxide, Tech. rep., World Health Organization, 2021.*

3. Very repetitive the paragraph below. Try to send the messages only once and add references in all cases:

*We will replace the paragraph with the following:*

*'In order to identify and quantify aerosol sources and corresponding source areas, significant effort is required by the Scientific Community. When this information is acquired, measures can be applied so as to improve air quality. Source apportionment methods are widely used for air quality*

*management, by providing information on the relationship between air pollutant sources and their concentrations. The quantification of the sources of air pollution, both in terms of their sectorial and spatial origins, constitutes an essential step of the air quality management process (Wesseling et al., 2019).'*

4. Better justify that the method used can be applied for secondary PM components, such as sulphate. For dust it is clear but in different seasons the SO<sub>2</sub> oxidation velocity might change and sulphate being formed faster or slowly and then the distance to the origin might change artificially for this. At least evaluate what effect it might have.

*We will add in the manuscript in the FLEXPART description, section 2.2:*

*In the case of Secondary Sulfate, we have to keep in mind that SO<sub>2</sub> is the primary emitted species and Secondary Sulfate is produced in the atmosphere through chemical reactions in gas and liquid phase. In order to calculate the uncertainty that this error induces to the calculated footprint, we refer to residence times in the atmosphere reported by Seinfeld and Pandis (1998), page 66. The SO<sub>2</sub> mean residence time reported due to dry deposition is 60 hours, its residence time due to wet deposition is 100 hours, and its residence time due to transformation to Secondary Sulfate is 80 hours. The resulting SO<sub>2</sub> residence time due to wet and dry deposition is 37.5 hours, while if we also include the transformation to Sulfate the overall mean residence time is 25 hours. The corresponding wet and dry deposition residence time indicated for Secondary Sulfate is 80 hours. Therefore, in such a case, SO<sub>2</sub> deposits (wet and dry deposition) twice as fast as Secondary Sulfate. These calculations correspond to the mid-latitudes (45°-65° North) according to Rodhe et al. FLEXPART model is provided with a Secondary Sulfate aerosol particle size distribution and it compensates for wet and dry deposition as it follows the species backward in time. The error in the calculation of the residence time in each geographic grid cell is mainly due to not accounting for the enhanced deposition of SO<sub>2</sub> for 1-2 days just after emission. But this enhanced wet and dry deposition for SO<sub>2</sub> should be applied only for a small fraction of the travel time. The mean error in residence time due to this discrepancy is expected to be close to 10%.*

*We also have to keep in mind that we do not present emission fluxes of the SO<sub>2</sub> emissions, but the origin of Secondary Sulfate aerosol measured at each station, if it was produced as such in the emitting grid cell. Therefore we report the combined effect of SO<sub>2</sub> emissions, air mass transport and environmental conditions that produce the Secondary Sulfate aerosol measured in the stations participating in the study. That is why the authors believe that we cannot apply the fluxes derived to very distant measurement stations, whose environmental conditions might be very different from the stations in the study. Also, the estimated error is calculated based on values derived for the mid-latitudes.*

5. Not clear to me how regional from long range sulphate and dust can be distinguished.

*According to Seinfeld and Pandis (1998), page 66, Secondary Sulfate has a mean residence time of 80 hours in the atmosphere. We therefore expect that most of the Secondary Sulfate aerosol measured at each station, has been produced in the atmosphere within the previous week. This would probably correspond to regional transport. The authors expect that most of the Dust aerosol measured at each*

*station would be regional, since it has a much larger aerodynamic mean diameter (3.1 micrometers), leading to much faster deposition velocity.*

*We will add in the manuscript in the FLEXPART model description, section 2.2:*

*"Since Secondary Sulfate has a mean residence time of 80 hours in the atmosphere, as reported by Seinfeld and Pandis (1998), we expect that most of the Secondary Sulfate aerosol measured at each station, has been produced in the atmosphere within the previous week.*

*This would probably correspond to regional transport, not global. The authors expect that most of the Dust aerosol measured at each station would be regional, since it has a much larger aerodynamic mean diameter of 3.1 micrometers, leading to much faster deposition velocity. In any case, both species are followed backward in time for 20 days, and residence times are attributed for all geographic grid cells. However, we use for the inversion the residence times in each cell for the area between latitude  $-30^{\circ}$  to  $90^{\circ}$  and longitude from  $-40^{\circ}$  to  $140^{\circ}$ ."*

6. You stated in text that 16 cities are studied and only 14 are indicated in the maps of Figure 1.

*In Figure 1a, Vilnius and Krakow are displayed but not included in the subtitle of the Figure.*

*We will correct it in the manuscript.*

7. You explain that only 14 were selected, but why 2 were excluded give reasons in methodology.

In lines 143 to 145 we state:

*"We did not exclude any station with an identified Secondary Sulfate source from the analysis for this species, as we consider that Secondary Sulfate and its precursor gases are emitted from many source areas in Europe and Asia (14 out of 16 stations were included)."*

*We will add in the manuscript in section 3.1 (Secondary Sulfate aerosol):*

*In 2 cities (Ankara, Lisbon), no Secondary Sulfate concentration was indicated by the PMF analysis. Therefore 14 out of the 16 cities could be included, namely Tirana, Zagreb, Chisinau, Athens, Skopje, Debrecen, Banja-Luka, Sofia, Belgrade, Krakow, Montenegro, Kurchatov, Dushanbe, Vilnius (around 2,050 measurements).*

*In section 2.3 on Tikhonov regularization we will add at the end:*

*A Secondary Sulfate aerosol species was identified in 14 out of 16 cities in the study, and therefore the two cities without this source (Ankara, Lisbon) were excluded. In a small number of samples in the 14 cities included in the study, negative contributions were apportioned. These samples were excluded from the dataset used in the Tikhonov regularization.*

*Dust aerosol source was identified in 16 cities. Nevertheless, after the PSCF analysis for Dust aerosol, only 6 cities were included in the Tikhonov regularization dataset. That is because the PSCF analysis indicated that most of the Dust aerosol identified was of local origin (Dust resuspension). Filter samples that had negative Dust source apportionment contributions were also excluded.*

8. For a number of cities did you applied PMF with less than 50 samples. Is this right? I do not think so.

*In lines 62-64 we state:*

*Further uncertainties to the source apportionment results are introduced by the fact that the stations of Chisinau, Sofia, Niksic, Lisbon, Ankara and Vilnius have available only 50 filter samples.*

*We will add in the manuscript in section 2.1 (PM sampling stations and filter analysis):*

*"We have not applied PMF to less than 50 samples in any of the cities. We applied PMF analysis on datasets with 50 samples from 5 cities (Chisinau, Sofia, Vilnius, Montenegro, Lisbon and Ankara). 50 samples have been recorded as the minimum necessary for a meaningful source apportionment analysis according to Johnson et al. (2001). Having said that, it has been identified in the past that small datasets (number of samples close to 50) pose an extra challenge when used for PMF because the solution is strongly affected by rotational ambiguity, and the overall uncertainty is increased. Before using the results we have fully assessed the uncertainty of the SA solution using the enhanced tool offered by EPA PMF 5.0. The uncertainty was within acceptable limits. We included these measurements because they are valuable, as aerosol data from these areas are scarce, and also, including them would diversify the origin of air masses used in the identification of source areas and emission fluxes, making our results more precise."*

9. R143-147 you select and exclude sites without supporting reasons.

*In lines 158-160 we state for the Secondary Sulfate aerosol result for Zagreb:*

*"We included the emission results for Zagreb as it was the station with the largest number of filter samples that participated in the study. This case indicates the results we could expect when we use data from a single station."*

*In lines 183-184 we state:*

*"Vilnius station was chosen for the demonstration of the results as it is situated on the edge of the area that the rest of the European stations of the study cover."*

*We will include in the manuscript (section 3.1, Secondary sulfate aerosol):*

*Our first approach was to apply the Tikhonov regularization to data from the 6 cities indicated by the PSCF analysis in Figure 2. Then we applied regularization to all 14 cities. We applied the Tikhonov regularization to all 14 cities with an identified Secondary Sulfate concentration, as we consider that Secondary Sulfate and its precursor gases are emitted from many source areas in Europe and Asia and we needed as many stations and measurements as possible in order to identify them.*

*We also produced two more emission flux results: One including only measurements from Zagreb (around 600 measurements), and one including all participating European cities except Vilnius (around 1,800 measurements). The first result is indicative of using a dataset from just one measurement station. In the second result we exclude Vilnius, Dushanbe and Kurchatov data. Dushanbe and Kurchatov are situated in a significant distance from other stations, out of the region of Europe. Vilnius on the other hand is on the edge of the area that is covered by European stations.*

*This result was produced as we wish to evaluate if by its use we could predict Secondary Sulfate concentration in Vilnius.*

10. R161 cite Figure 3.

*We will add in the manuscript the OMI – HTAP emission map provided by NASA ([https://avdc.gsfc.nasa.gov/pub/data/project/OMI\\_HTAP\\_emis/v1.1](https://avdc.gsfc.nasa.gov/pub/data/project/OMI_HTAP_emis/v1.1)) (Liu et al, 2018).*

*We will add in the manuscript in section 3.1, Secondary Sulfate aerosol:*

*We also observe in Figure 3 that the areas indicated by the Tikhonov regularization solution for 14 cities (Figure 3b), namely the Central and Western Balkans, South Poland and the area East of the Caspian Sea, are apparent also in the ECLIPSE database map (Klimont et al., 2017).*

*When we compare the OMI – HTAP emission map for SO<sub>2</sub> and the emission map acquired by the Tikhonov regularization for the investigated European cities excluding Vilnius (Figure 4a), we observe many similarities.*

11. All this section on sulphate is very confuse, you select some cities, then you do not include because low samples and then use others. At the end the reader does not know what you have done and why you exclude and select ones or the others.

*We will add in the methodology on Tikhonov regularization the datasets used for Secondary Sulfate and Dust aerosol and some justification (please refer to point 7). We will also add justification on the selection of cities at the beginning of the Secondary Sulfate and Dust results sections (please see point 9).*

*The authors believe that this is now addressed in the manuscript.*

*We will also add in the manuscript, at the end of section 1 (Introduction):*

*We have to mention here that the emission fluxes retrieved are subject to air mass transport paths, atmospheric conditions and atmospheric chemistry. In other words, if a geographic grid cell emits a pollutant, but air mass transport does not allow these emissions to reach any of the measurement stations in the study, this cell will not be attributed the emission flux that it has. For species like Secondary Sulfate, identical precursor gases emission fluxes could lead to different aerosol concentrations, depending on atmospheric conditions and chemistry. It is also possible that locally produced aerosol (that is within the station grid cell), cannot be correctly associated to residence time in the grid cell. That is because emission fluxes in the vicinity of the measurement stations have a very small residence time until they arrive to the station and a very high impact on the measured concentration. Despite of these potential problems, the information on specific geographic grid cells that actually impact the measurement stations area is focused on where we have to apply mitigation measures for long range transport.*

*We will also add in the Tikhonov regularization description, section 2.3:*

*Sulfate or Dust concentration at each measurement station is due to local production and long range transport. With Tikhonov regularization we aim not to perfectly reconstruct the concentrations*

measured at each station, but find  $x_{exact}$ . For local aerosol, produced in the vicinity of the measurement station, we expect that we will have a high impact on the concentration and a small impact on the residence time in the station grid cell. Therefore, matrix A mostly corresponds to the part of the concentration that is transported to the site from other grid cells and cannot accurately describe local aerosol. However, we expect that during the Tikhonov regularization procedure, while we search for  $x_{exact}$ , and we depart from perfectly reconstructing measured concentration, local aerosol will be attributed as noise and we will recover the correct emission fluxes.

12. Why you did not use OMI or TROPOMI for SO<sub>2</sub> concentrations in addition to Eclipse maps?

These show much better the SO<sub>2</sub> hotspots.

We have added in the manuscript the 1° \* 1° degree OMI\_HTAP emissions map (Liu et al, 2018) for 2015.

13. Furthermore, I do not see properly that Eclipse and your maps show similar high SO<sub>2</sub> regions.

The most significant areas that appear to affect the measurement stations in the European region are in the Balkans and South Poland. We have added patches so as to indicate these areas in the OMI\_HTAP maps included now in the manuscript. The same areas are apparent also in the ECLIPSE database emission map.

14. Figure 4 you do not reach a good agreement for Vilnius but you do not mention for the other cities.

We display Vilnius because it was not included in the dataset (along with Kurchatov and Dushanbe) that produced the solution in Figure 3b. The aim was to show that we could produce a meaningful approximation to the concentration in a nearby city whose data were not used in the procedure to acquire the solution. We should have stressed that probably locally produced Secondary Sulfate (produced within the same grid cell as the station) is included in the concentration and this value cannot be represented correctly in the solution, which is analogous to residence time in the grid cells.

We will add in the manuscript the least square regression for each Secondary Sulfate and Dust solution between the measured and modeled concentrations (based on the Tikhonov regularization solution for each case).

We will also add the following in the manuscript, in section 4 (Summary and Conclusions):

"The results display that we do not have a good agreement between the measured and modeled concentrations, which probably indicates that resuspended Dust and locally produced Secondary Sulfate is present in the measured concentrations. This was expected, as with Tikhonov regularization we depart from perfectly reproducing the measured concentrations (fidelity term). We have to mention here that the purpose of the regularization method is to identify and quantify emission fluxes from each geographic region. In this process, the part of the concentration that can be represented is mainly the one corresponding to long range transport."

15. You state that it might be precipitation the reason for the lack of this agreement but no support is given for this.

*We state in lines 182-183:*

*From July to September are the months with the most precipitation in Vilnius (WMO, 2013).*

*We will remove this statement.*

*We will add in section 3.1.1 (The case of Vilnius):*

*The lowest PM<sub>2.5</sub> concentrations in the dataset are observed during August, September and nearly the end of October. This could also be related to the beginning of the winter season, with increased emissions due to heating.*

16. I am not able to identify in the result section on sulphate how and what are the emission fluxes you cited in the abstract.

*We will add in section 3.1, Secondary Sulfate aerosol:*

*In Figure 3b which corresponds to the solution for all available data (14 stations), the highest values are as follows:*

*For the area East of the Caspian Sea, the maximum value is  $10 \cdot 10^{-12} \text{ kg} \cdot \text{m}^{-2} \cdot \text{s}^{-1}$  for latitude  $37^{\circ}$ - $38^{\circ}$  North and longitude  $67^{\circ}$ - $68^{\circ}$  East. In the OMI-HTAP map, the maximum value in the area is in latitude  $39^{\circ}$ - $40^{\circ}$  North and  $65^{\circ}$ - $66^{\circ}$  East, with a value of  $7.7 \cdot 10^{-8} \text{ kg} \cdot \text{m}^{-2} \cdot \text{s}^{-1}$ .*

*For the area in the west Balkans, the maximum value is  $7.8 \cdot 10^{-12} \text{ kg} \cdot \text{m}^{-2} \cdot \text{s}^{-1}$  for latitude  $44^{\circ}$ - $45^{\circ}$  degrees North and longitude  $16^{\circ}$ - $17^{\circ}$  East. In the OMI-HTAP map, the maximum value in the area is in latitude  $44^{\circ}$ - $45^{\circ}$  North and  $18^{\circ}$ - $19^{\circ}$  East, with a value of  $9.2 \cdot 10^{-8} \text{ kg} \cdot \text{m}^{-2} \cdot \text{s}^{-1}$ .*

*For the area in Poland, the maximum value is  $6.1 \cdot 10^{-12} \text{ kg} \cdot \text{m}^{-2} \cdot \text{s}^{-1}$  for latitude  $49^{\circ}$ - $50^{\circ}$  degrees North and longitude  $19^{\circ}$ - $20^{\circ}$  East. In the OMI-HTAP map, the maximum value in the area is in latitude  $51^{\circ}$ - $52^{\circ}$  North and  $19^{\circ}$ - $20^{\circ}$  East, with a value of  $5.3 \cdot 10^{-8} \text{ kg} \cdot \text{m}^{-2} \cdot \text{s}^{-1}$ .*

*For the area in the Central Balkans, the maximum value is  $8.3 \cdot 10^{-12} \text{ kg} \cdot \text{m}^{-2} \cdot \text{s}^{-1}$  for latitude  $42^{\circ}$ - $43^{\circ}$  North and longitude  $20^{\circ}$ - $21^{\circ}$  East. In the OMI-HTAP map, the maximum value in the area is in latitude  $44^{\circ}$ - $45^{\circ}$  North and  $18^{\circ}$ - $19^{\circ}$  East, with a value of  $9.3 \cdot 10^{-8} \text{ kg} \cdot \text{m}^{-2} \cdot \text{s}^{-1}$ .*

17. Dust I am not able to see in the map that NW Africa is the main source, especially for Tirana.

*We will add in the manuscript in section 3.2 (Dust aerosol):*

*In Figure 7 the PSCF for the 90th percentile for Dust aerosol is presented. For Tirana two paths can be seen: In the first path, winds from the Atlantic Ocean pass over NW Africa, then the Mediterranean Sea and subsequently reaching Tirana. In the second path winds from the Atlantic Ocean pass over NW Africa, then NE Africa and the Mediterranean Sea, subsequently reaching Tirana. The second path is by far the prevailing one for the 90th percentile highest concentrations of Dust aerosol for Tirana, as can be seen in Figure A.3 in the appendix. Please keep in mind that the residence times depicted correspond to a height up to 500 m so as to always be within the boundary layer. Therefore, while the Dust load could be mainly picked up in both cases in NW Africa, due to longer residence times in NE Africa, this area could appear as the most probable to be the one that emits Dust aerosol. This could be partly due to the fact that as the air masses travel over Africa at low altitude, wind speed is reducing due to higher friction over land in comparison to when they travel over the Sea (Atlantic or Mediterranean). The air masses probably have higher speed over NW Africa and this results in more dust being picked up in this area. Some Dust aerosol could be picked up from NE*

*Africa and its origin could also be the Arabian Peninsula. This path is also evident in Figure 8, where a weak emission area is indicated in the NE Africa. While for the PSCF analysis, Tirana, Zagreb and Belgrade indicate high probability for NE Africa to be a source area, this is not the case for the Tikhonov regularization result. In Figure 8, the result indicates that NW Africa is by far the most significant Dust aerosol source area for the 6 cities (Athens, Belgrade, Debrecen, Lisbon, Tirana and Zagreb) whose data were used. NE Africa also has a hotspot in Figure 8, but its contribution was significantly lower when the data from these 6 stations are combined.*

18. IN many cases is N Africa, but not the well known large sources from NW Africa, Central and S Argelia, Mauritania, Sahara,....

That are not covered by the map patches.

*We will add in the manuscript in section 3.2 (Dust aerosol):*

*In the borders between Mauritania, Algeria and Mali, the highest emission fluxes are identified (lat 27° N, long -4° E) which are as high as  $17.6 \cdot 10^{-12} \text{ kg} \cdot \text{m}^{-2} \cdot \text{s}^{-1}$ .*

19. Summary: 16 or 14 cities?

*The initial dataset included 16 cities. A Secondary Sulfate aerosol source was apportioned through PMF in 14 cities. We used all 14 of them. We used for Dust aerosol results from 6 cities. There was one city whose results were not used (Ankara) and one city whose results were used only for Dust (Lisbon).*

*We will add in the manuscript in the Summary section (Summary and Conclusions):*

*Emission fluxes of Secondary Sulfate and Dust aerosol were identified and their transport contribution was quantified based on a dataset including measurements in 16 cities in Europe and Asia. In the Secondary Sulfate case 14 out of the 16 cities were used as only in those a Secondary Sulfate aerosol source was apportioned through PMF analysis. In the Dust aerosol case 6 cities were used as in the rest of the cities, based on PSCF analysis, Dust aerosol was considered to be of local origin. There was one city whose results were not used at all (Ankara) and one city whose results were used only for Dust aerosol (Lisbon). Data from Chisinau, Skopje, Banja-Luka, Sofia, Belgrade, Montenegro, Kurchatov, Dushanbe, Vilnius were only used for the Secondary Sulfate aerosol case.*

*In section 2.1 (PM sampling stations and filter analysis) we will add in the beginning:*

*More than 2,200 PM<sub>2.5</sub> samples were collected in urban and sub-urban background stations from 16 European and Central Asian cities (Tirana, Zagreb, Chisinau, Athens, Skopje, Debrecen, Banja-Luka, Sofia, Belgrade, Krakow, Montenegro, Kurchatov, Dushanbe, Vilnius, Lisbon, Ankara)*

20. Summary you give the quantitative emission fluxes for both dust and sulphate without showing results on it in the prior sections?????

*We will add in the Results section the emission fluxes for Dust and Secondary Sulfate, as mentioned in points 16 and 18.*

*References:*



*Johnson, T., Guttikunda, S., Wells, G., Artaxo, P., Bond, T., Russell, A., Watson, J., and West, J.: Tools for Improving Air Quality Management: A Review of Top-Down Source Apportionment Techniques and Their Application in Developing Countries, World Bank, Washington, DC, 2011.*

*Liu, F., Choi, S., Li, C., Fioletov, V. E., McLinden, C. A., Joiner, J., Krotkov, N. A., Bian, H., Janssens-Maenhout, G., Darmenov, A. S., and da Silva, A. M.: A new global anthropogenic SO<sub>2</sub> emission inventory for the last decade: a mosaic of satellite-derived and bottom-up emissions, Atmospheric Chemistry and Physics, 18, 16 571–16 586, <https://doi.org/10.5194/acp-18-16571-2018>, 2018.*

*Rodhe, H.: Budgets and turn-over times of atmospheric sulfur compounds, Atmospheric Environment (1967), 12, 671–680, 370 [https://doi.org/10.1016/0004-6981\(78\)90247-0](https://doi.org/10.1016/0004-6981(78)90247-0), 1978.*
